# Supplementary material
Source: PubMed Central journal article supplement (PMC8164567)
Supplement: NIHMS1701739-supplement-Supporting_Information.pdf [file NIHMS1701739-supplement-Supporting_Information.pdf]

## Supporting information

# Extractive Ratio Analysis NMR Spectroscopy for Metabolite Identification in Complex Biological Mixtures

Liladhar Paudel,<sup>1,2</sup> G. A. Nagana Gowda,<sup>1</sup> and Daniel Raftery<sup>1,3,4\*</sup>

<sup>1</sup>*Northwest Metabolomics Research Center, Anesthesiology and Pain Medicine, and*

<sup>3</sup>*Department of Chemistry, University of Washington, Seattle, WA 98109,*

<sup>4</sup>*Fred Hutchinson Cancer Research Center, Seattle, WA 98109*

<sup>2</sup>*Currently at Lubrizol Advanced Materials, 9911 Brecksville Road, Brecksville, OH 44141*

\* Corresponding Author:

Professor Daniel Raftery  
Northwest Metabolomics Research Center  
Department of Anesthesiology and Pain Medicine  
University of Washington  
850 Republican St.  
Seattle, WA 98109  
Tel: 206-543-9709  
Fax: 206-616-4819  
Email: draftery@uw.edu

This file contains 13 pages, S1 to S13. The first page is the Title page; pages S2 to S4 contain Table S1, Table S2 and Table S3, respectively; pages S5 and S6 contain MatLab script for data smoothing and data normalization, respectively; pages S7 to S13 contain Figure S1 to Figure S7, respectively.

**Table S1.** List of standard compounds used for initial testing of E-RANSY analysis.

| Number | Compound Name                      | Concentration ( $\mu\text{M}$ ) |
|--------|------------------------------------|---------------------------------|
| 1      | 2-Hydroxybutyric acid              | 311.3                           |
| 2      | 2-Hydroxyisovalerate               | 315.0                           |
| 3      | 2-Oxoisocaproate                   | 317.2                           |
| 4      | 2-Oxoisovalerate                   | 316.2                           |
| 5      | 3-Hydroxyisovalerate               | 315.2                           |
| 6      | 3-Methyl-2-oxovalerate             | 311.7                           |
| 7      | Acetate                            | 313.5                           |
| 8      | Benzoic acid                       | 314.4                           |
| 9      | Citrate                            | 312.3                           |
| 10     | Formate                            | 313.5                           |
| 11     | Fumarate                           | 316.8                           |
| 12     | Hippuric acid                      | 312.5                           |
| 13     | Isobutyric acid                    | 314.1                           |
| 14     | Isovalerate                        | 316.2                           |
| 15     | Lactate                            | 312.0                           |
| 16     | Succinate                          | 313.7                           |
| 17     | Aconitate, trans-                  | 314.0                           |
| 18     | Alpha-ketoglutarate, sodium salt   | 312.6                           |
| 19     | Isocitrate, trisodium salt hydrate | 311.9                           |
| 20     | Malate                             | 314.6                           |
| 21     | Oxaloacetate                       | 317.9                           |
| 22     | Pyruvate, sodium salt              | 317.1                           |
| 23     | Nicotinic acid                     | 317.3                           |
| 24     | 3-Methylhistidine                  | 313.2                           |
| 25     | Arginine                           | 312.5                           |
| 26     | Asparagine                         | 318.4                           |
| 27     | Aspartate                          | 312.2                           |
| 28     | Histidine                          | 315.1                           |
| 29     | Isoleucine                         | 316.4                           |
| 30     | Methionine                         | 313.5                           |
| 31     | Phenylalanine                      | 315.0                           |
| 32     | Serine                             | 317.0                           |
| 33     | Tryptophan                         | 312.0                           |
| 34     | Tyrosine                           | 313.9                           |
| 35     | Valine                             | 315.4                           |
| 36     | Acetylcarnitine                    | 313.6                           |
| 37     | Betaine                            | 312.9                           |
| 38     | Carnitine                          | 312.5                           |
| 39     | Choline                            | 312.5                           |
| 40     | Creatine                           | 315.9                           |
| 41     | Creatinine                         | 314.6                           |
| 42     | 1,2-Propanediol                    | 317.5                           |
| 43     | 2-Propanol                         | 314.5                           |
| 44     | Acetone                            | 316.0                           |
| 45     | Dimethylamine                      | 313.9                           |
| 46     | Dimethylglycine                    | 314.4                           |
| 47     | Ethanol                            | 318.4                           |
| 48     | Glycerol                           | 312.0                           |
| 49     | Uridine                            | 314.5                           |

**Table S2.** Parameters used in solvent-solvent extraction of compounds from standard mixtures for E-RANSY analysis.

| Sample No. | Sample volume (μL) | Sample volume after pH adjustment (μL) | pH    | Ethyl Acetate volume (μL) | Ethyl Acetate Extract taken for drying (μL) | DI water Added (μL) | Time used to completely dry (hrs) |
|------------|--------------------|----------------------------------------|-------|---------------------------|---------------------------------------------|---------------------|-----------------------------------|
| 1          | 500                | 550                                    | 0.57  | 1833                      | 1375                                        | 200                 | 10                                |
| 2          | 500                | 550                                    | 1.07  | 1833                      | 1375                                        | 200                 | 10                                |
| 3          | 500                | 550                                    | 1.76  | 1833                      | 1375                                        | 200                 | 10                                |
| 4          | 500                | 550                                    | 2.29  | 1833                      | 1375                                        | 200                 | 10                                |
| 5          | 500                | 550                                    | 2.52  | 1833                      | 1375                                        | 200                 | 10                                |
| 6          | 500                | 550                                    | 3.23  | 1833                      | 1375                                        | 200                 | 10                                |
| 7          | 500                | 550                                    | 3.69  | 1833                      | 1375                                        | 200                 | 10                                |
| 8          | 500                | 550                                    | 4.25  | 1833                      | 1375                                        | 200                 | 10                                |
| 9          | 500                | 550                                    | 4.60  | 1833                      | 1375                                        | 200                 | 10                                |
| 10         | 500                | 550                                    | 5.20  | 1833                      | 1375                                        | 200                 | 10                                |
| 11         | 500                | 550                                    | 5.69  | 1833                      | 1375                                        | 200                 | 10                                |
| 12         | 500                | 550                                    | 6.17  | 1833                      | 1375                                        | 200                 | 10                                |
| 13         | 500                | 550                                    | 7.07  | 1833                      | 1375                                        | 200                 | 10                                |
| 14         | 500                | 550                                    | 7.06  | 1833                      | 1375                                        | 200                 | 10                                |
| 15         | 500                | 550                                    | 7.69  | 1833                      | 1375                                        | 200                 | 10                                |
| 16         | 500                | 550                                    | 8.83  | 1833                      | 1375                                        | 200                 | 10                                |
| 17         | 500                | 550                                    | 10.96 | 1833                      | 1375                                        | 200                 | 10                                |
| 18         | 500                | 550                                    | 11.40 | 1833                      | 1375                                        | 200                 | 10                                |
| 19         | 500                | 550                                    | 12.01 | 1833                      | 1375                                        | 200                 | 10                                |

**Table S3.** Parameters used in solvent-solvent extraction of urine metabolites for E-RANSY analysis.

| Sample number | Sample volume ( $\mu\text{L}$ ) | Sample volume after pH adjustment ( $\mu\text{L}$ ) | pH   | Ethyl Acetate volume ( $\mu\text{L}$ ) | Ethyl Acetate volume used for drying ( $\mu\text{L}$ ) | Time to dry (hrs) |
|---------------|---------------------------------|-----------------------------------------------------|------|----------------------------------------|--------------------------------------------------------|-------------------|
| 1             | 600                             | 725                                                 | 0.54 | 2400                                   | 2000                                                   | 8                 |
| 2             | 600                             | 725                                                 | 1.00 | 2400                                   | 2000                                                   | 8                 |
| 3             | 600                             | 725                                                 | 1.41 | 2400                                   | 2000                                                   | 8                 |
| 4             | 600                             | 725                                                 | 2.01 | 2400                                   | 2000                                                   | 8                 |
| 5             | 600                             | 725                                                 | 2.46 | 2400                                   | 2000                                                   | 8                 |
| 6             | 600                             | 725                                                 | 3.03 | 2400                                   | 2000                                                   | 8                 |
| 7             | 600                             | 725                                                 | 3.36 | 2400                                   | 2000                                                   | 8                 |
| 8             | 600                             | 725                                                 | 3.97 | 2400                                   | 2000                                                   | 8                 |
| 9             | 600                             | 725                                                 | 4.56 | 2400                                   | 2000                                                   | 8                 |
| 10            | 600                             | 725                                                 | 4.99 | 2400                                   | 2000                                                   | 8                 |
| 11            | 600                             | 725                                                 | 5.55 | 2400                                   | 2000                                                   | 8                 |
| 12            | 600                             | 725                                                 | 5.95 | 2400                                   | 2000                                                   | 8                 |
| 13            | 600                             | 725                                                 | 6.33 | 2400                                   | 2000                                                   | 8                 |
| 14            | 600                             | 725                                                 | 7.36 | 2400                                   | 2000                                                   | 8                 |

## MatLab script for the binomial smoothing function algorithm

```
function binomial_smoothing(k)
clearvars -global;
file2read='testdata.xlsx'; % file name of Excel Workbook
sheet2read='testdata'; % sheet name of dataset
range2read='C:P'; %data range; here data are found in column C to
column P

[data,text,all]=xlsread(file2read,sheet2read,range2read);
ppmdata=data(1:end,1);
data=data(1:end,2:end);
[rownum,colnum]=size(data);

%%smoothing function matrix
if k==2
binomat=[1 1];
elseif k==3
binomat=[1 2 1];
elseif k==4
binomat=[1 3 3 1];
elseif k==6
binomat=[1 5 10 10 5 1];
elseif k==12
binomat=[1 11 55 165 330 462 462 330 165 55 11 1];
elseif k==18
binomat=[1 17 136 680 2380 6188 12376 19448 24310 24310 19448 12376
6188 2380 680 136 17 1];
else
return
end
N1=length(binomat);

N2=(rownum*colnum/N1);
data2=reshape(data,[N1,N2]);

data3=transpose(repmat(binomat,N2,1));
data4=data2.*data3;
data5=sum(data4,1);
N3=rownum/N1;
sm_data=reshape(data5,[N3,colnum]);

sm_ppm=ppmdata(ceil(N1/2):N1:end,:);

sheetidx=round(N3/1000);
output_sheet=sprintf('%s_binosm_%dk',sheet2read,sheetidx);
%saving output_sheet variable to .mat file
%save(output_sheet);

xlswrite(file2read,text,output_sheet,'A1');
xlswrite(file2read,[sm_ppm,sm_data],output_sheet,'A2');
end
```

## MatLab script for the spectral normalization algorithm

```
%%norm2CS (normalization to column sum i.e. normalization to total
sum)
function norm2CS()
if nargin~=0
    error('Must not enter any argument')
end
clearvars -global;
%%
tic
file2read='test.xlsx'; % file name of Excel Workbook
sheet2read='sheet1'; % Sheet name of the dataset
range2read='A:N'; %%ppm data and all ten samples initially taken

[data,text,~]=xlsread(file2read,sheet2read,range2read);
ppmdata=data(1:end,1:3);
data=data(1:end,4:end);
outdata =(bsxfun (@rdivide, data, sum(data)));
outdata=[ppmdata,outdata];
toc
%%
output_sheet=sprintf('%s_norm2CS',sheet2read);
xlswrite(file2read,text,output_sheet,'A1');
xlswrite(file2read,outdata,output_sheet,'A2');

%%
toc
end
```

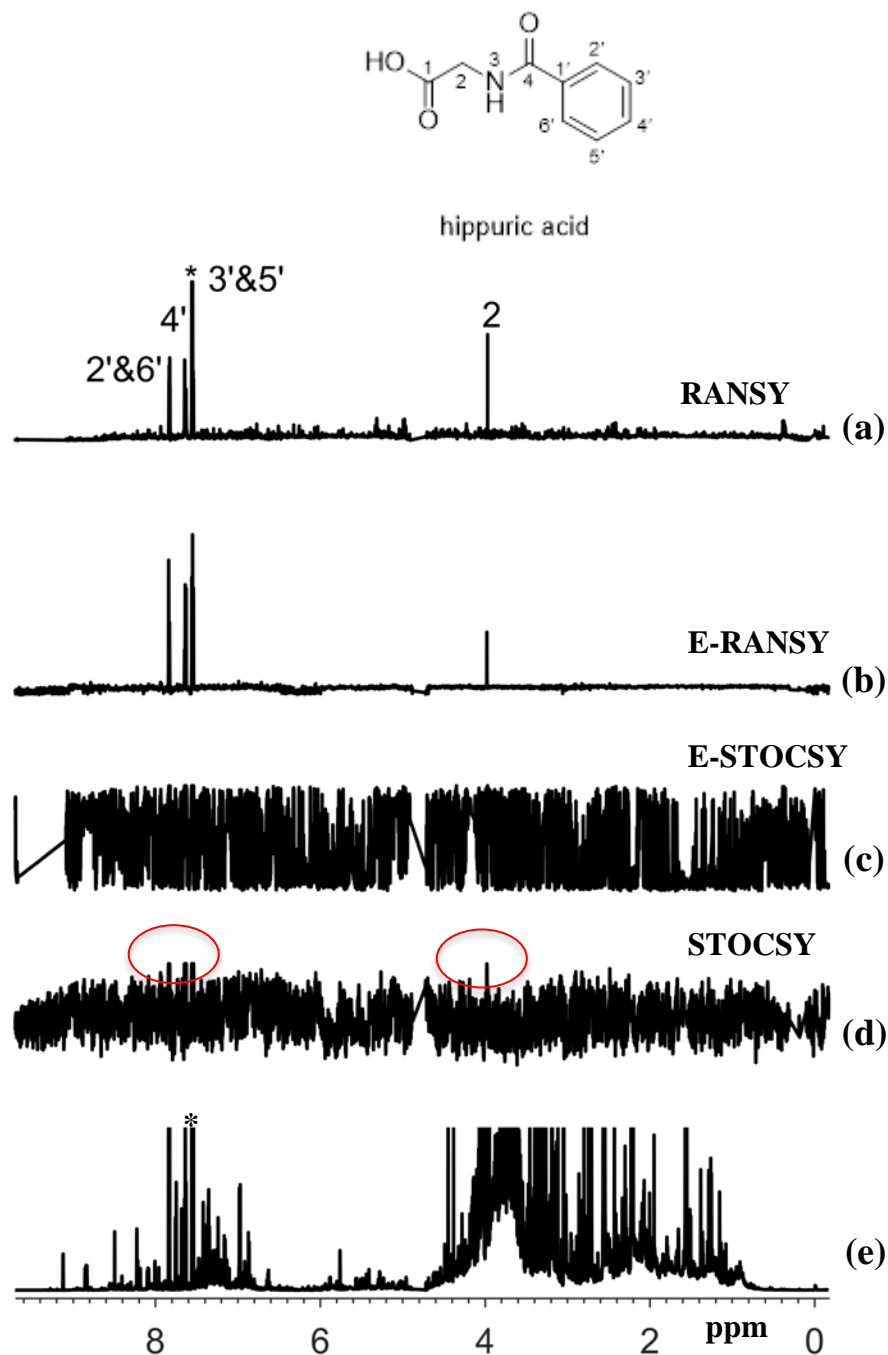

**Figure S1.** Comparison of the results of ratio analysis and correlation analysis of either extracted urine or intact urine spectra using the driving peak as indicated by asterisk (\*). The spectra shown are (a) RANSY; (b) E-RANSY; (c) E-STOCSY, (d) STOCSY and (e) the intact urine 1D  $^1\text{H}$  NMR spectrum. The two red ovals indicate the weak hippuric acid STOCY peaks. The inset shows the structure of hippuric acid identified based on RANSY/E-RANSY. Peaks in the RANSY spectrum are labeled with corresponding protons as labeled in the structure of the metabolite. For RANSY and STOCSY, intact urine NMR spectra were used, and for E-RANSY and E-STOCSY, ethyl acetate extracted urine NMR spectra were used.

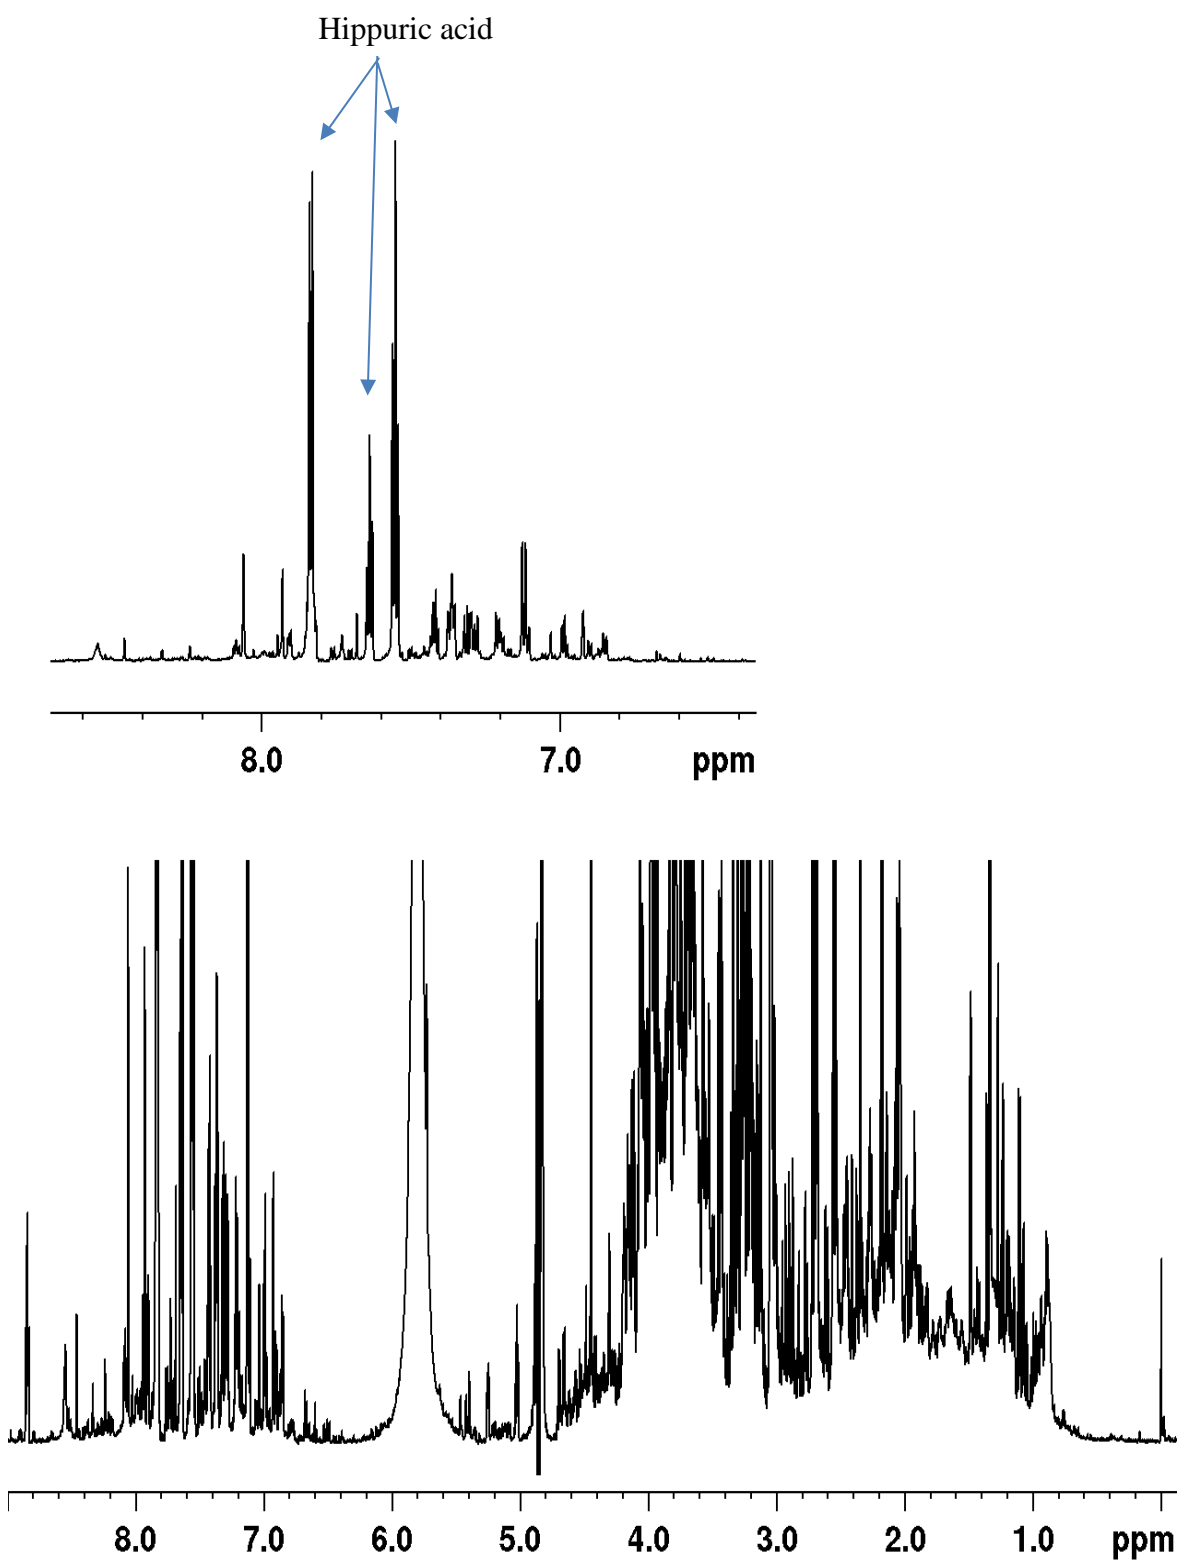

**Figure S2.** A typical human urine  $^1\text{H}$  NMR spectrum highlighting the generally dominant peaks from hippuric acid as shown in the expanded region of the spectrum (inset).



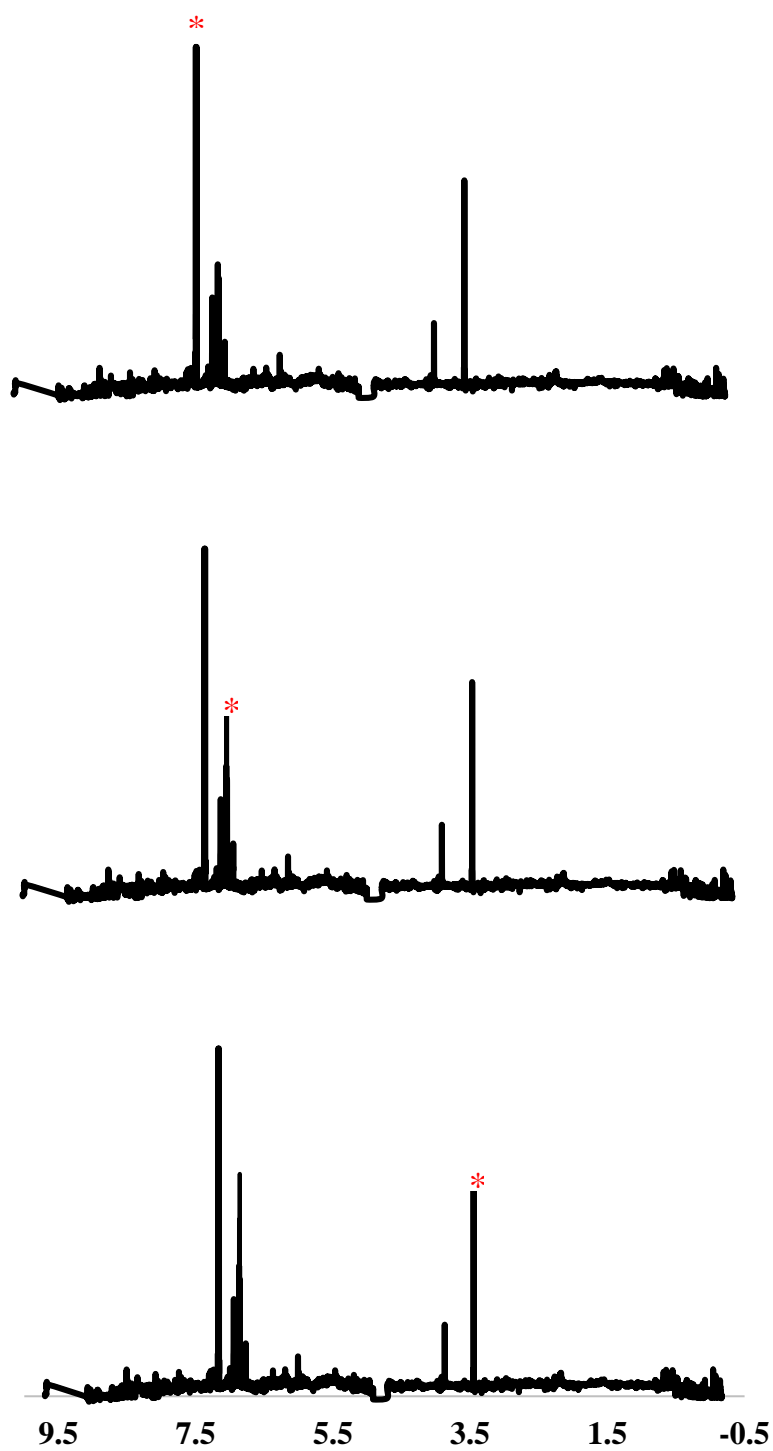

**Figure S3.** E-RANSY spectra of 4-hydroxyphenylacetic acid obtained using different peaks as the driver peak, separately. The driver peak for each spectrum is indicated by \*. Note, virtually identical spectra are obtained irrespective of the peak chosen as the driver peak.

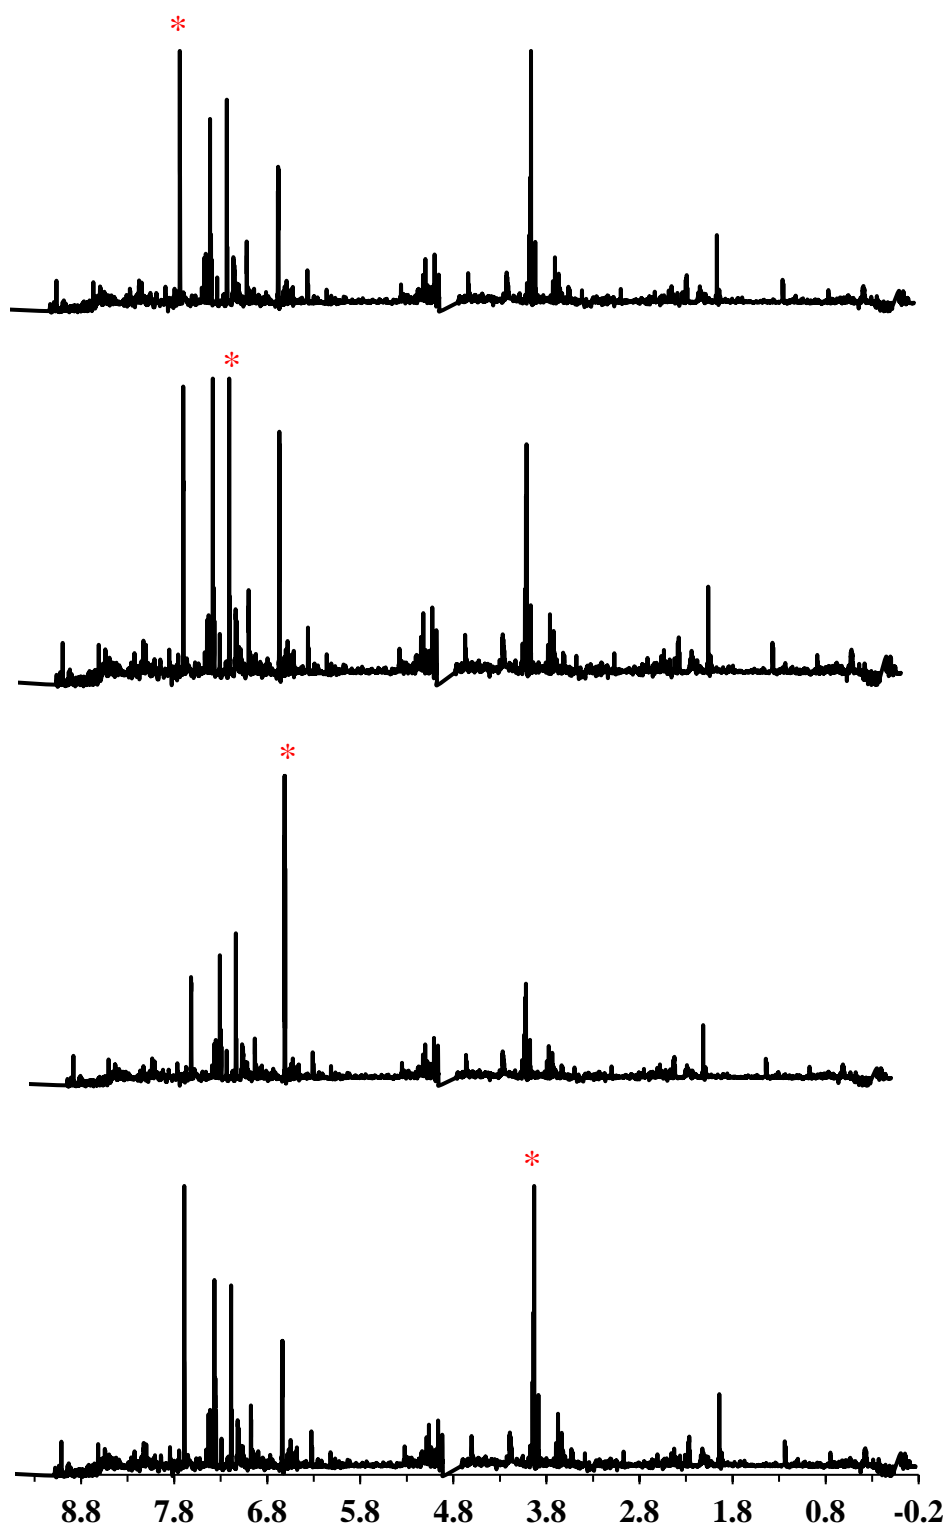

**Figure S4.** E-RANSY spectra of 2-furoylglycine obtained using different peaks as the driver peak, separately. The driver peak for each spectrum is indicated by \*. Note, virtually identical spectra (with some variation in amplitudes) are obtained irrespective of the peak chosen as the driver peak.

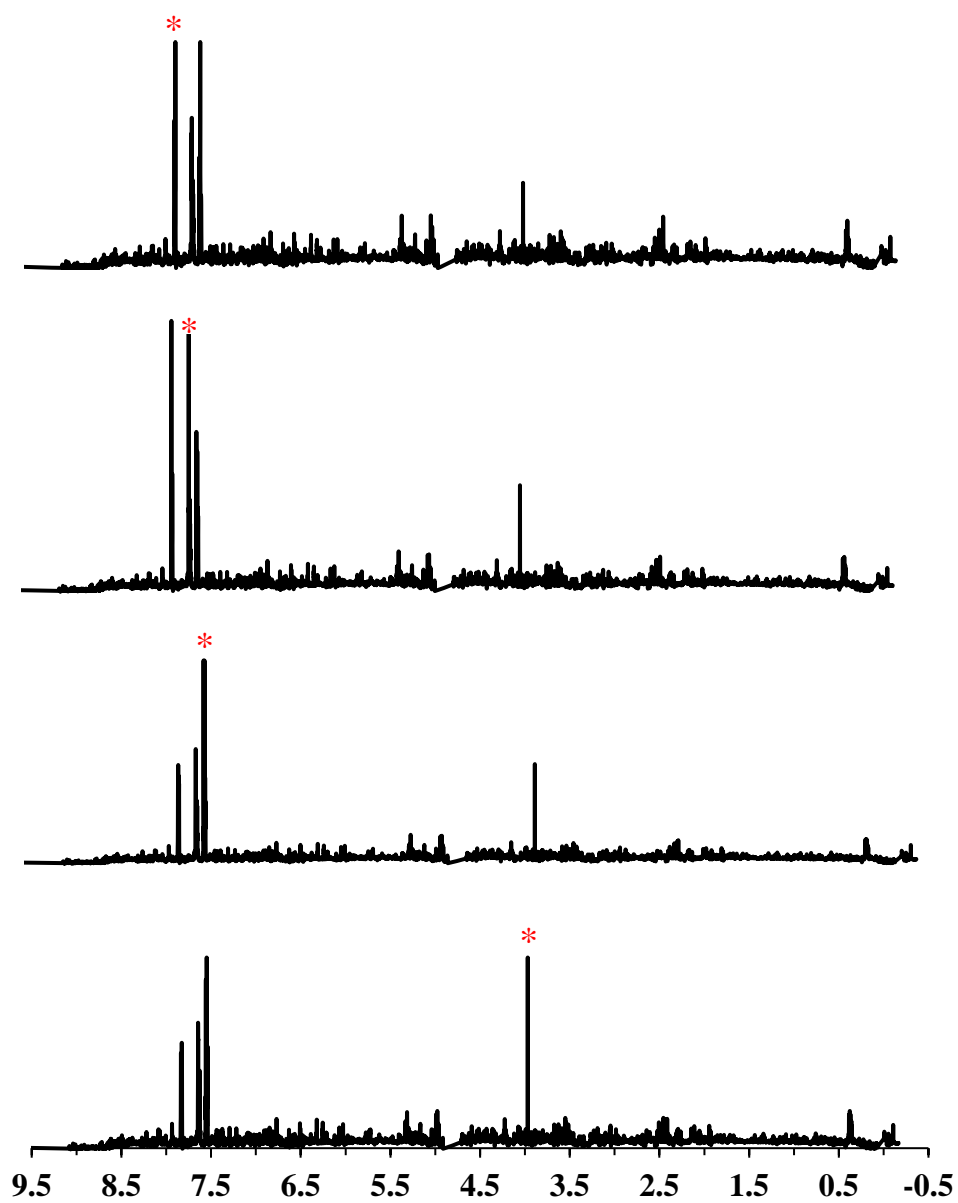

**Figure S5.** E-RANSY spectra of hippuric acid obtained using different peaks as the driver peak, separately. The driver peak for each spectrum is indicated by \*. Note, virtually identical spectra (with some variation in amplitudes) are obtained irrespective of the peak chosen as the driver peak.

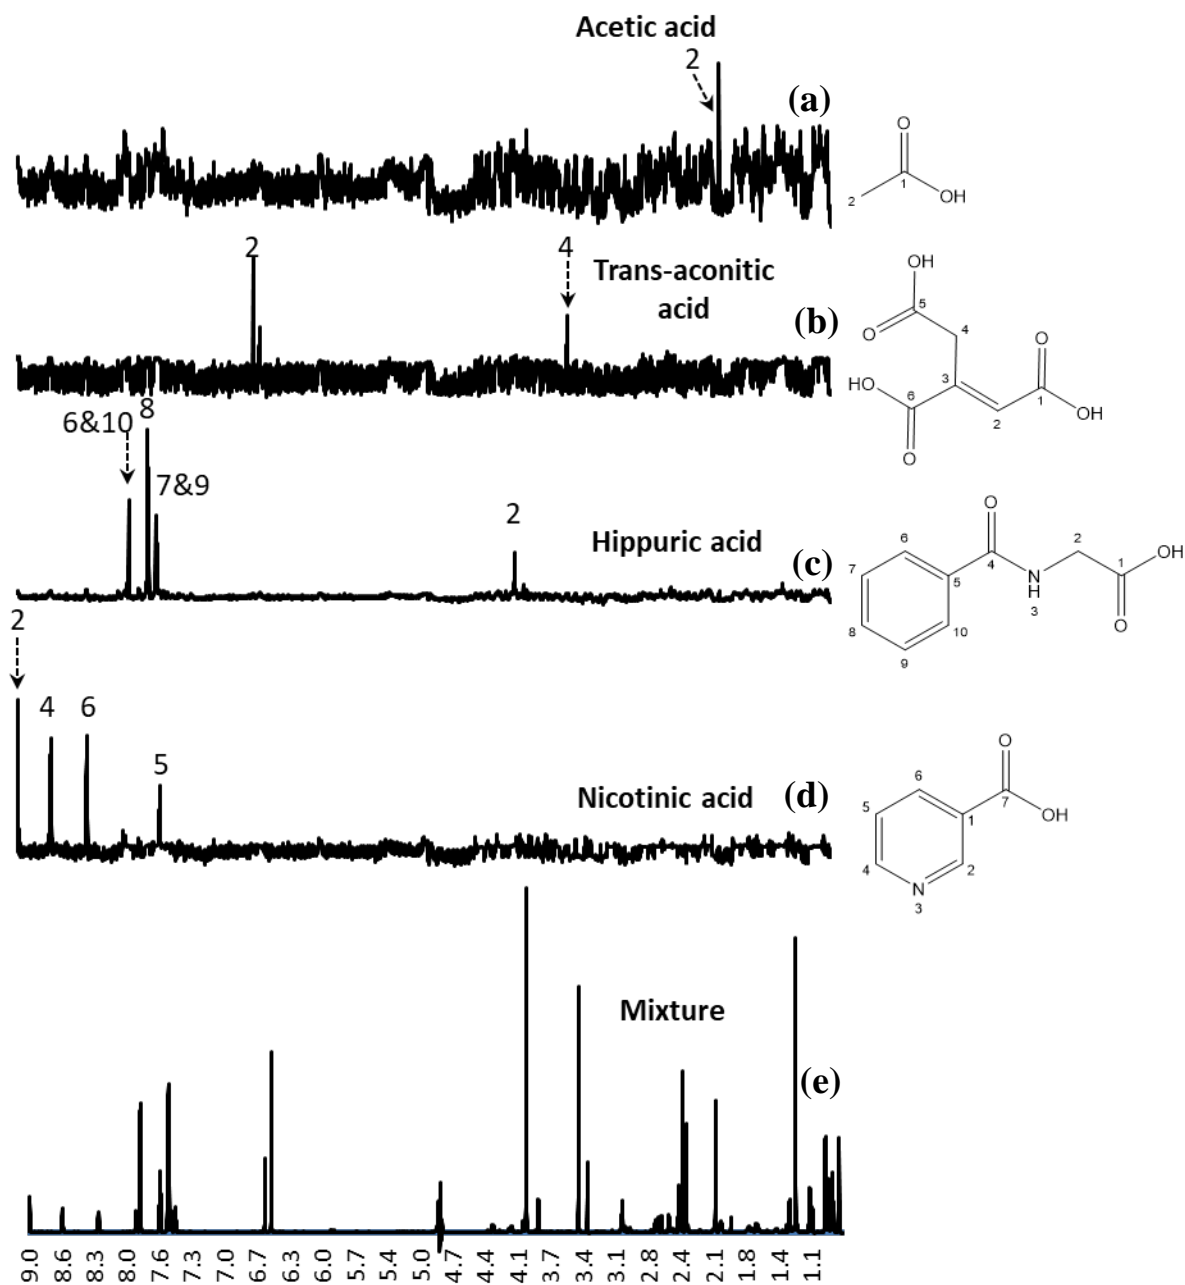

**Figure S6.** E-RANSY spectra (a-d) for a few standard compounds obtained after the analysis of an ethyl acetate extracted standard mixture of 49 compounds (see Table S1); (e)  $^1\text{H}$  800 MHz spectrum of a mixture of the standards.

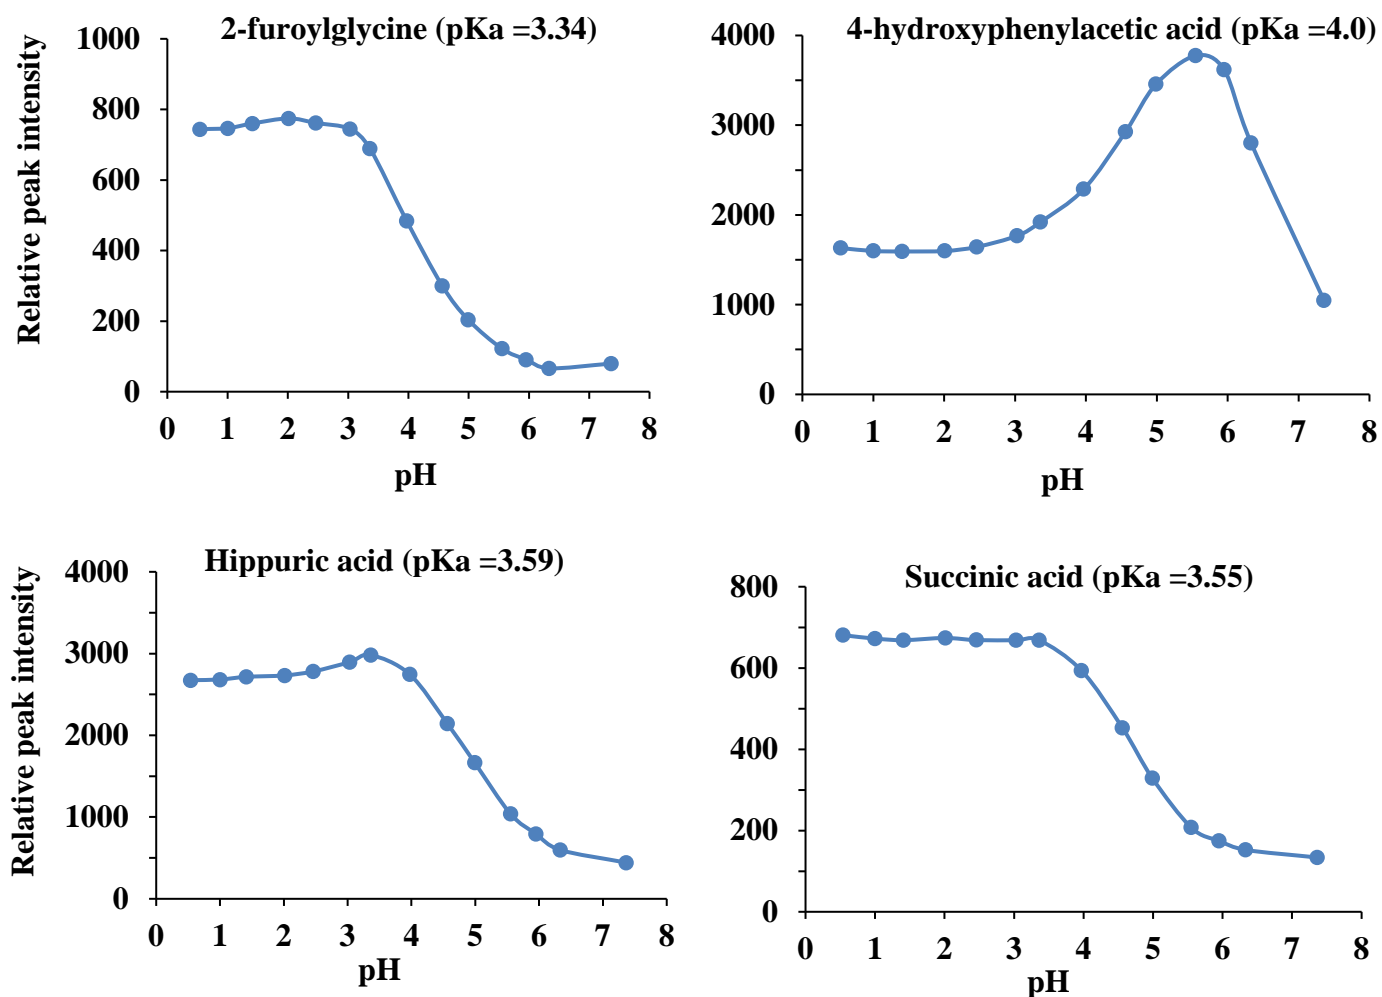

**Figure S7.** Variation of the relative NMR peak intensities for typical metabolites from the carboxylic acid class, 2-furoylglycine, 4-phenylacetic acid, hippuric acid and succinic acid, from urine after extraction into ethyl acetate at different pH values.
